# Supplementary material for: Large-scale modulation of reconstituted Min protein patterns and gradients by defined mutations in MinE’s membrane targeting sequence
Source: PubMed Central journal article supplement (PMC5473585; doi:10.1371/journal.pone.0179582), 2017-06-16
Supplement: pone.0179582.s006.pdf [file pone.0179582.s006.pdf]

**S1 Table. Primers used to generate mutations in MinE**

| <b>Primer name</b> | <b>Sequence (5'-3')</b>                  |
|--------------------|------------------------------------------|
| MinE_L3E_fwd       | GGATCCGAATTCGCAGAACTCGATTTCTTTCT         |
| MinE_L3E_rev       | AGAAAGAAATCGAGTTCTGCGAATTCGGATCC         |
| MinE_L4E_fwd       | TCCGAATTCGCATTAGAAGATTTCTTTCTCTCG        |
| MinE_L4E_rev       | CGAGAGAAAGAAATCTTCTAATGCGAATTCGGA        |
| MinE_F6E_fwd       | TTCGCATTACTCGATGAATTTCTCTCGCGGAAG        |
| MinE_F6E_rev       | CTTCCGCGAGAGAAATTCATCGAGTAATGCGAA        |
| MinE_F7E_fwd       | GCATTACTCGATTTCGAACTCTCGCGGAAGAAA        |
| MinE_F7E_rev       | TTTCTTCCGCGAGAGTTGAAATCGAGTAATGC         |
| MinE_Δ(2-12)_fwd_1 | CGCGGATCCGAATTCAACACAGCCAACATTGCAAAAAGAA |
| MinE_Δ(2-12)_rev_1 | AATGTTGGCTGTGTTGAATTCGGATCCGCGACCCATTG   |
| MinE_Δ(2-12)_fwd_2 | CCGCCTTTGAGTGAGCTGATACCGCTCGCCGCAGCCGAA  |
| MinE_Δ(2-12)_rev_2 | CTCACTCAAAGGCGGTAATACGGTTATCCACAGAATCAG  |
| MinE_I24N_fwd      | AAGAACGGCTGCAGAACATTGTTGCTGAACGC         |
| MinE_I24N_rev      | GCGTTCAGCAACAATGTTCTGCAGCCGTTCTT         |
