# Supplementary material for: Large-scale modulation of reconstituted Min protein patterns and gradients by defined mutations in MinE’s membrane targeting sequence
Source: PubMed Central journal article supplement (PMC5473585; doi:10.1371/journal.pone.0179582), 2017-06-16
Supplement: pone.0179582.s007.pdf [file pone.0179582.s007.pdf]

**S2 Table. Absolute numbers of different dynamic modes observed for WT MinE and MinE  $\Delta(2-12)$ , L3E and F6E in PDMS microcompartments.** Modes were counted in three independent experiments imaging multiple compartments respectively ( $N \geq 55$  compartments). If mode switching occurred within the same compartment, both modes were counted.

| <b>MinE Variant</b>              | <b>Pole-to-pole oscillations</b> | <b>Traveling waves</b> | <b>Rotations</b> |
|----------------------------------|----------------------------------|------------------------|------------------|
| <b>WT</b>                        | 81                               | 0                      | 0                |
| <b><math>\Delta(2-12)</math></b> | 13                               | 12                     | 40               |
| <b>L3E</b>                       | 41                               | 17                     | 44               |
| <b>F6E</b>                       | 104                              | 15                     | 20               |
